# Supplementary material for: NONCODEV6: an updated database dedicated to long non-coding RNA annotation in both animals and plants
Source: PubMed Central journal article supplement — Nucleic Acids Res. 2020 Nov 16;49(D1):D165–71. doi: 10.1093/nar/gkaa1046 (PMC7779048; doi:10.1093/nar/gkaa1046), 2020-11-16
Supplement: gkaa1046_supplemental_file.pdf [file gkaa1046_supplemental_file.pdf]

**Supplementary Table 1 The tissue RNA-seq data sources used in NONCODEV6.**

| Species                     | Tissue                        | Data source | Citation  |     |
|-----------------------------|-------------------------------|-------------|-----------|-----|
| <i>Arabidopsis thaliana</i> | Whole Seedlings (3-day-old)   | SRR9682375  | [1]       |     |
|                             |                               | SRR9682376  |           |     |
|                             |                               | SRR9682377  |           |     |
|                             | Cotyledons (3-day-old)        | SRR9682378  |           |     |
|                             |                               | SRR9682379  |           |     |
|                             |                               | SRR9682380  |           |     |
|                             | Roots (3-day-old)             | SRR9682381  |           |     |
|                             |                               | SRR9682382  |           |     |
|                             |                               | SRR9682383  |           |     |
|                             | Leaves                        | SRR10205863 |           | [2] |
|                             |                               | SRR10205864 |           |     |
|                             |                               | SRR10205865 |           |     |
|                             | Stems                         | SRR10205866 |           |     |
|                             |                               | SRR10205867 |           |     |
|                             |                               | SRR10205868 |           |     |
|                             | Sperm cells                   | SRR7945266  |           | [3] |
|                             |                               | SRR7945267  |           |     |
|                             |                               | SRR7945268  |           |     |
|                             | Mature pollen                 | SRR10166243 |           |     |
|                             |                               | SRR10166244 |           |     |
|                             |                               | SRR10166245 |           |     |
| Flowers(floral bud)         | SRR800753                     | [4]         |           |     |
|                             | SRR800754                     |             |           |     |
| Whole root (10-day-old)     | SRR1046909                    | [5]         |           |     |
|                             | SRR1046910                    |             |           |     |
| Seed(dry)                   | SRR5227391                    |             |           |     |
|                             | SRR5227392                    |             |           |     |
|                             | SRR5227393                    |             |           |     |
| Flower Receptacles          | SRR401413;SRR401414;SRR401415 |             | [6]       |     |
|                             | SRR401416;SRR401417;SRR401418 |             |           |     |
|                             | SRR401419;SRR401420;SRR401421 |             |           |     |
| <i>Cucumis sativus</i>      | Ovary (unexpanded )           |             | SRR351476 |     |
|                             | Ovary (fertilized)            |             | SRR351489 |     |
|                             | Ovary (unfertilized)          |             | SRR351495 |     |
|                             | Root                          |             | SRR351499 |     |
|                             | Stem                          |             | SRR351905 |     |
|                             | Leaf                          |             | SRR351906 |     |
|                             | Male flower                   |             | SRR351908 |     |
|                             | Tendril                       |             | SRR351910 |     |
| Tendril base                | SRR351911                     |             |           |     |

|                                 |                                                     |                         |      |
|---------------------------------|-----------------------------------------------------|-------------------------|------|
|                                 | Female flower                                       | SRR351912               |      |
|                                 | Caryopsis(7 days after<br>pollination)              | SRR10423445             |      |
|                                 |                                                     | SRR10423446             |      |
|                                 |                                                     | SRR10423447             |      |
|                                 | Crown root                                          | SRR10060561             |      |
|                                 |                                                     | SRR10060562             |      |
|                                 | Lateral root                                        | SRR10060569;SRR10060570 |      |
|                                 |                                                     | SRR10060571;SRR10060572 |      |
|                                 | Embryonic root                                      | SRR10060579             |      |
|                                 |                                                     | SRR10060580             |      |
|                                 | Egg (mature egg isolated from<br>ovule)             | SRR10915165             |      |
|                                 |                                                     | SRR10915166             |      |
|                                 | Unicellular zygote (6.5 hours<br>after pollination) | SRR10915167             |      |
|                                 |                                                     | SRR10915168             |      |
| <i>Oryza sativa</i>             | Seedling root (4-leaf stage)                        | SRR10045073             |      |
|                                 |                                                     | SRR10045074             | [7]  |
|                                 |                                                     | SRR10045075             |      |
|                                 | Leaves (five-week-old)                              | SRR8062393              |      |
|                                 |                                                     | SRR8062397              |      |
|                                 | Endosperm (6 day after<br>pollination)              | SRR1743007              |      |
|                                 |                                                     | SRR1743008              |      |
|                                 |                                                     | SRR1743009              |      |
|                                 | Shoot (four-leaf stage)                             | SRR6326699              |      |
|                                 |                                                     | SRR6326700              | [8]  |
| SRR6326701                      |                                                     |                         |      |
| Pistil(before meiosis)          | SRR5278374                                          |                         |      |
|                                 | SRR5278375                                          |                         |      |
| Pistil(during meiosis)          | SRR5278376                                          |                         |      |
|                                 | SRR5278377                                          | [9]                     |      |
| Pistil(after meiosis)           | SRR5278378                                          |                         |      |
|                                 | SRR5278379                                          |                         |      |
| <i>Solanum<br/>lycopersicum</i> | Floral (HRFR)                                       | SRR786520               |      |
|                                 |                                                     | SRR786521               |      |
|                                 | Leaf (HRFR)                                         | SRR786524               |      |
|                                 |                                                     | SRR786525               |      |
|                                 | Root (HRFR)                                         | SRR786526               |      |
|                                 |                                                     | SRR786527               |      |
|                                 | Seedling (HRFR)                                     | SRR786528               | [10] |
|                                 |                                                     | SRR786529               |      |
|                                 | Stem (HRFR)                                         | SRR786530               |      |
|                                 |                                                     | SRR786531               |      |
| Vegetative meristem (HRFR)      | SRR786532                                           |                         |      |
|                                 | SRR786533                                           |                         |      |

|                                  |                     |
|----------------------------------|---------------------|
|                                  | SRR786534           |
|                                  | SRR786535           |
| Floral (LRFR)                    | SRR786536           |
|                                  | SRR786537           |
|                                  | SRR786540           |
| Leaf (LRFR)                      | SRR786541           |
|                                  | SRR786542           |
|                                  | SRR786543           |
| Root (LRFR)                      | SRR786544           |
|                                  | SRR786545           |
| Seedling (LRFR)                  | SRR786546           |
|                                  | SRR786547           |
|                                  | SRR786548           |
|                                  | SRR786549           |
| Vegetative meristem (LRFR)       | SRR786550           |
|                                  | SRR786551           |
|                                  | SRR242505           |
| Seedling                         | SRR248565           |
|                                  | SRR250415           |
|                                  | SRR254171           |
| Ovule                            | SRR254172           |
|                                  | SRR254175           |
|                                  | SRR250416           |
| Mature pollen                    | SRR255405           |
|                                  | SRR252662           |
|                                  | SRR254169           |
| Embryo Sac                       | SRR254170           |
|                                  | SRR254176           |
|                                  | SRR354212           |
| Mature leaf (mesophyll cell)     | SRR354213           |
|                                  | SRR354214           |
| Mature leaf (bundle sheath cell) | SRR354215           |
|                                  | SRR364426           |
| Endosperm                        | SRR364427           |
|                                  | SRR364428           |
| Leaf (base section)              | SRR039501;SRR039502 |
| Leaf (-1cm section)              | SRR039503;SRR039504 |
| Leaf (4cm section)               | SRR039505;SRR039506 |
| Leaf (tip section)               | SRR039507;SRR039508 |
| Immature,unpollinated ear tips   | SRR445244           |
| Seedling root                    | SRR445245           |
| Seedling shoot                   | SRR445382           |
| Immature tassel                  | SRR445383           |

1. Cannon, A. E., Yan, C., Burks, D. J., Rao, X., Azad, R. K., & Chapman, K. D. (2020). Lipophilic signals lead to organ-specific gene expression changes in *Arabidopsis* seedlings. *Plant direct*, *4*(7), e00242.
2. Zandalinas, S. I., Fichman, Y., Devireddy, A. R., Sengupta, S., Azad, R. K., & Mittler, R. (2020). Systemic signaling during abiotic stress combination in plants. *Proceedings of the National Academy of Sciences of the United States of America*, *117*(24), 13810–13820.
3. Borg, M., Jacob, Y., Susaki, D., LeBlanc, C., Buendía, D., Axelsson, E., Kawashima, T., Voigt, P., Boavida, L., Becker, J., Higashiyama, T., Martienssen, R., & Berger, F. (2020). Targeted reprogramming of H3K27me3 resets epigenetic memory in plant paternal chromatin. *Nature cell biology*, *22*(6), 621–629.
4. Slotte, T., Hazzouri, K. M., Ågren, J. A., Koenig, D., Maumus, F., Guo, Y. L., Steige, K., Platts, A. E., Escobar, J. S., Newman, L. K., Wang, W., Mandáková, T., Vello, E., Smith, L. M., Henz, S. R., Steffen, J., Takuno, S., Brandvain, Y., Coop, G., Andolfatto, P., ... Wright, S. I. (2013). The *Capsella rubella* genome and the genomic consequences of rapid mating system evolution. *Nature genetics*, *45*(7), 831–835.
5. Narsai, R., Gouil, Q., Secco, D., Srivastava, A., Karpievitch, Y. V., Liew, L. C., Lister, R., Lewsey, M. G., & Whelan, J. (2017). Extensive transcriptomic and epigenomic remodelling occurs during *Arabidopsis thaliana* germination. *Genome biology*, *18*(1), 172.
6. Niederhuth, C. E., Patharkar, O. R., & Walker, J. C. (2013). Transcriptional profiling of the *Arabidopsis* abscission mutant *hae hsl2* by RNA-Seq. *BMC genomics*, *14*, 37.
7. Yang, J., Chang, Y., Qin, Y., Chen, D., Zhu, T., Peng, K., Wang, H., Tang, N., Li, X., Wang, Y., Liu, Y., Li, X., Xie, W., & Xiong, L. (2020). A lamin-like protein OsNMCP1 regulates drought resistance and root growth through chromatin accessibility modulation by interacting with a chromatin remodeller OsSWI3C in rice. *The New phytologist*, *227*(1), 65–83.
8. Fu, J., Wu, H., Ma, S., Xiang, D., Liu, R., & Xiong, L. (2017). OsJAZ1 Attenuates Drought Resistance by Regulating JA and ABA Signaling in Rice. *Frontiers in plant science*, *8*, 2108.
9. Zhu, Y., Yu, Y., Cheng, K., Ouyang, Y., Wang, J., Gong, L., Zhang, Q., Li, X., Xiao, J., & Zhang, Q. (2017). Processes Underlying a Reproductive Barrier in *indica-japonica* Rice Hybrids Revealed by Transcriptome Analysis. *Plant physiology*, *174*(3), 1683–1696.
10. Koenig, D., Jiménez-Gómez, J. M., Kimura, S., Fulop, D., Chitwood, D. H., Headland, L. R., Kumar, R., Covington, M. F., Devisetty, U. K., Tat, A. V., Tohge, T., Bolger, A., Schneeberger, K., Ossowski, S., Lanz, C., Xiong, G., Taylor-Teeple, M., Brady, S. M., Pauly, M., Weigel, D., ... Maloof, J. N. (2013). Comparative transcriptomics reveals patterns of selection in domesticated and wild tomato. *Proceedings of the National Academy of Sciences of the United States of America*, *110*(28), E2655–E2662.
